# Supplementary material for: Single-step enzymatic synthesis of (R)-2-O-α-d-glucopyranosyl glycerate, a compatible solute from micro-organisms that functions as a protein stabiliser
Source: Royal Society of Chemistry journal article supplement (doi:10.1039/b912621j), 2009-01-01
Supplement: b912621j.pdf [file b912621j.pdf]

## Supplementary Information

# Single-step enzymatic synthesis of (*R*)-2-*O*- $\alpha$ -D-glucopyranosyl glycerate, a compatible solute from micro-organisms that functions as protein stabiliser

Thornthan Sawangwan, Christiane Goedl and Bernd Nidetzky\*

Institute of Biotechnology and Biochemical Engineering, Graz University of Technology,  
Petersgasse 12/I A-8010 Graz, Austria; Phone +43-316-873-8400; Fax +43-316-873-8434;  
e-mail: bernd.nidetzky@tugraz.at

### Table of Contents

| Contents                                                     | Page |
|--------------------------------------------------------------|------|
| Influence of Ca <sup>2+</sup> on enzymatic synthesis         | S-2  |
| Variation of temperature to optimise the enzymatic synthesis | S-3  |
| HPLC analysis of the product mixture                         | S-4  |

**Supplementary Table 1.** Influence of  $\text{Ca}^{2+}$  on the enzymatic synthesis of **2**. The reaction mixture contained 0.3 M sucrose, 0.15 M *R*-glycerate and 20 U/ml sucrose phosphorylase in 50 mM MES buffer, pH 7.0. Samples were taken after 24 h, inactivated by heating and analysed by HPLC. Yield is based on the concentration of glycerate converted. The production rate is the formation of product per time and enzyme activity applied. A control reaction containing NaCl was also performed. This was used to determine the effect of a change in ionic strength on enzymatic synthesis. The results show that neither  $\text{Ca}^{2+}$  nor ionic strength affects the enzymatic synthesis significantly.

|                       | <b>Product</b><br>[M] $\times 10^{-2}$ | <b>Yield</b><br>[%] | <b>Production rate</b><br>[M h <sup>-1</sup> 1000 kU] $\times 10^{-2}$ |
|-----------------------|----------------------------------------|---------------------|------------------------------------------------------------------------|
| no additive           | 10.8                                   | 72                  | 22.4                                                                   |
| 0.2 M NaCl            | 10.2                                   | 68                  | 21.3                                                                   |
| 0.1 M $\text{CaCl}_2$ | 9.9                                    | 66                  | 20.7                                                                   |

**Supplementary Table 2.** Variation of temperature to optimise the enzymatic synthesis of **2**. The reaction mixture contained sucrose and *R*-glycerate each 0.3 M, 20 U/ml sucrose phosphorylase in 50 mM MES buffer, pH 7.0. Samples were taken after 1, 2, 3 and 5 h, inactivated by heating and analysed by HPLC. Mean values of production rates (formation of product per time and enzyme activity applied) are given.

| <b>Temperature<br/>[°C]</b> | <b>Production rate<br/>[M h<sup>-1</sup> 1000 kU] × 10<sup>-2</sup></b> |
|-----------------------------|-------------------------------------------------------------------------|
| 25                          | 43.6                                                                    |
| 30                          | 61.7                                                                    |
| 35                          | 75.6                                                                    |
| 40                          | 75.0                                                                    |

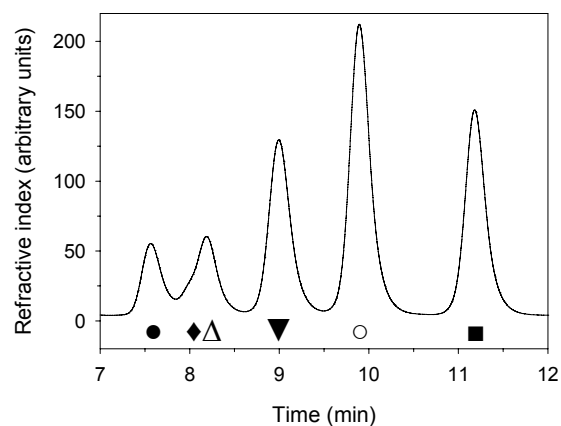

**Supplementary Figure 1.** HPLC analysis of the product mixture obtained by enzymatic conversion of sucrose in the presence of racemic *R/S*-glycerate, leading to formation of **2** and **3**. The experiment was performed using 0.3 M sucrose and 0.3 M *R/S*-glycerate. Twenty U/ml sucrose phosphorylase in 50 mM MES buffer, pH 7.0, was used. After 72 h of incubation at 30 °C, the sample was inactivated by heating and analysed. The symbols indicate sucrose (●), **3** (◆), **2** (Δ), D-glucose (▼), D-fructose (○), and *R/S*-glycerate (■). The main product peak is assigned to **2**. The shoulder (on the left) of the product peak indicates formation of **3** as second product.
